# Supplementary material for: Efficacy of Lactic Acid Bacteria as a Biocontrol Agent against Anthracnose (Persea americana Miller) Decay in Avocado (Persea americana) cv Fuerte Fruit
Source: MDPI journal article supplement (doi:10.3390/agriculture13020269), 2023-01-22
Supplement: s1 [file s1]

### Supplementary Table S1

**Table S1.** Biofilm formation by LAB 21 and LAB 56 against *C. gloeosporioides*

| Treatment                                | Incubation period |            |            |            | Degree of biofilms formed |            |            |            |
|------------------------------------------|-------------------|------------|------------|------------|---------------------------|------------|------------|------------|
|                                          | 3h                | 24h        | 48h        | 72h        | 3h                        | 24h        | 48h        | 72h        |
| <b>Control</b>                           | 0.07±0.00e        | 0.07±0.00e | 0.09±0.00e | 0.09±0.08e | No biofilm                | No biofilm | No biofilm | No biofilm |
| <b>LAB 21</b>                            | 0.16±0.01c        | 0.26±0.04c | 0.32±0.03c | 0.36±0.06c | Weak                      | Weak       | Moderate   | Moderate   |
| <b>LAB 56</b>                            | 0.09±0.00d        | 0.15±0.01d | 0.16±0.06d | 0.21±0.01d | Weak                      | Weak       | weak       | Weak       |
| <b>LAB 21+ <i>C. gloeosporioides</i></b> | 0.19±0.01a        | 0.50±0.04a | 0.54±0.08a | 2.35±0.05a | Moderate                  | Strong     | Strong     | Strong     |
| <b>LAB 56+ <i>C. gloeosporioides</i></b> | 0.16±0.00b        | 0.44±0.01b | 0.48±0.00b | 1.10±0.02b | Weak                      | Strong     | Strong     | Strong     |
| <b><i>C. gloeosporioides</i></b>         | 0.08±0.02e        | 0.09±0.06e | 0.09±0.07e | 0.09±0.05e | No biofilm                | No biofilm | No biofilm | No biofilm |

Values are logarithmic mean ± standard deviation of each expressed genes triplicate determination, and distinct superscripts differ substantially along the column by  $p \leq 0.05$ . Keys: Control: Sterile distil water; LAB 21: *Weissella cibaria* (standalone); LAB 56: *Leu. pseudomesenteroides* 56 (standalone); LAB 21+ *C. gloeosporioides*: *Weissella cibaria* & *C. gloeosporioides*; LAB 56+ *C. gloeosporioides*: *Leu. Pseudomesenteroides* & *C. gloeosporioides*; *C. gloeosporioides*: *C. gloeosporioides* (standalone).
